# Supplementary material for: A fluorescent probe based on benzothiazole and benzoindole for detecting hydrazine in various applications
Source: Royal Society of Chemistry journal article supplement (doi:10.1039/d5nj00197h), 2025-01-01
Supplement: d5nj00197h1.pdf [file d5nj00197h1.pdf]

**A fluorescent probe based on benzothiazole and benzoindole for  
detecting hydrazine in various applications**

Junjie Yang,<sup>a</sup> Xianjun Xu,<sup>a</sup> Liqiang Yan,<sup>a\*</sup> Xiongzhi Wu,<sup>a</sup>

*<sup>a</sup> College of Chemistry and Bioengineering, Guilin University of Technology, Guilin,  
Guangxi 541006, P.R. China*

\*Corresponding author, E-mail: liqiangyan@glut.edu.cn

Table S1. Comparison of the detection performance of some recent fluorescent probes.

| probe                                                                               | solvent                                 | $\lambda_{ex}$ | $\lambda_{em}$ | LOD           | smartphone app | application                                                              | Ref.      |
|-------------------------------------------------------------------------------------|-----------------------------------------|----------------|----------------|---------------|----------------|--------------------------------------------------------------------------|-----------|
| 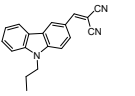   | DMSO/HEPES (1/99, v/v, pH 7.4)          | 420 nm         | 568 nm         | 6.3 nM        | No             | Soil, human serum, human urine plants foods, beverages, HeLa cells       | 19        |
|    | DMF/H <sub>2</sub> O (1/1, v/v, pH 7.4) | 383 nm         | 435 nm         | 1.85 $\mu$ M  | No             | Soil, Water, gaseous hydrazine                                           | 46        |
|    | DMSO/PBS (9/1, v/v, pH 7.4)             | 342 nm         | 556 nm         | 0.29 $\mu$ M  | No             | Soil, HepG-2 cells, zebrafish, water, test strips                        | 47        |
|    | DMSO/PBS (1/99, v/v, pH 7.4)            | 405 nm         | 656 nm         | 0.18 $\mu$ M  | No             | Soil, water, plants                                                      | 48        |
|    | DMSO/PBS (1/3, v/v, pH 7.4)             | 445 nm         | 535 nm         | 0.85 nM       | No             | test strips, beverages, water, human urine                               | 49        |
|    | THF/H <sub>2</sub> O (4/6, v/v, pH 7.3) | 365/430 nm     | 469/630 nm     | 58 nM         | No             | food, test strips, HeLa cells, zebrafish                                 | 50        |
|   | DMSO/PBS (1/1, v/v, pH 7.4)             | 365 nm         | 523 nm         | 0.15 $\mu$ M  | No             | Soil, water, test strips, HeLa cells                                     | 15        |
|  | H <sub>2</sub> O                        | 334/345 nm     | 392/517 nm     | 0.1 mM        | No             | Soil, test strips                                                        | 43        |
|  | DMSO/PBS (9/1, v/v, pH 7.4)             | 455 nm         | 501/561 nm     | 0.184 $\mu$ M | No             | HepG2 cells, soil, Zebrafish, water                                      | 51        |
|  | DMSO/PBS (4/1, v/v, pH 7.4)             | 375 nm         | 486 nm         | 0.025 $\mu$ M | Yes            | water, beverages, test strips, cotton swabs, hydrogel, soil, plant, food | This work |

## S1. Reagents and Instruments

Table S2. The instruments and their parameters.

| Instrument Name                             | Model number                       | Source                             |
|---------------------------------------------|------------------------------------|------------------------------------|
| NMR                                         | Ascend TM NMR 500<br>MHz           | Bruker (Beijing) Technology<br>Co. |
| UV-Vis<br>Fluorescence<br>spectrophotometer | Lambda 750<br>Cary Eclipse FL 1005 | PerkinElmer<br>VARIAN USA          |
| FTIR spectrometer                           | Nicolet Is5                        | Thermo Fisher Scientific           |
| Electronic Analytical Balance               | EL204                              | Mettler Toledo Instruments Ltd     |

Table S3. The reagents and their specifications

| Reagent                          | Grade or purity | Source           |
|----------------------------------|-----------------|------------------|
| 5-Methylsalicylaldehyde          | 96%             | Energy Chemmical |
| 2-Aminothiophenol                | 96%             | Aladdin          |
| Hexamethylene tetramine          | AR              | Aladdin          |
| Allyl bromide                    | 98%             | Aladdin          |
| 1,1,2-Trimethyl-1H-b3na[e]indole | 98%             | Energy Chemmical |
| Iodoethane                       | 99%             | RHAWN            |
| Hydrazine hydrate                | 80%             | XIHUA            |

## S2. Fluorescence spectra test

All test samples of probe **1** (10  $\mu$ M) were prepared in the mixture of DMSO/PBS (4:1, v/v, 10 mM, pH 7.4). The emission spectra were recorded at room temperature with the excitation wavelength of 375 nm and slit width of 10/10 nm.

## S3. Water analysis

The detection data for  $N_2H_4$  in actual water samples were obtained using the spiked recovery method. The water samples, including pond water and drinking water,

were collected from Guilin University of Technology, and were subjected to centrifugation and filtration. Then they were mixed with DMSO at 7:3 (v/v), and the pH was adjusted to 7.4.

#### **S4. Preparation of test strips and swabs**

The filter paper was cut into a circle of 1 cm × 1 cm and subsequently immersed in a dichloromethane solution containing the probe **1** (200 μM), and the probe-containing test paper was obtained after the solvent was completely evaporated.

For the detection of N<sub>2</sub>H<sub>4</sub> in water samples, 15 μL of test solution containing different concentrations of N<sub>2</sub>H<sub>4</sub> (0, 1%, 5%, 10%, 20%, 30%, 60%) was added dropwise onto the test paper, respectively. 1 min later, the color change of the test papers was observed under 365 nm UV light. 15 μL of Different beverages (milk, coconut milk, cola, orange juice, Sprite, white wine, pond water) without and with N<sub>2</sub>H<sub>4</sub> (200 μM) were added dropwise onto the test papers to observe the fluorescence changes.

For N<sub>2</sub>H<sub>4</sub> gas, the test papers loaded with probe **1** (200 μM) was placed at the mouth of the bottle of N<sub>2</sub>H<sub>4</sub> solution at different concentrations (0, 1%, 5%, 10%, 20%, 30%, 40%) and waited for the volatilization of N<sub>2</sub>H<sub>4</sub>, and then the fluorescence change of the papers was detected by taking pictures with a smartphone under a hand-held UV lamp at 365 nm after 1 min.

The cotton swabs, soaked with probe **1** (200 μM), were directly placed into reagent bottles containing N<sub>2</sub>H<sub>4</sub> at various concentrations (0, 20, 40, 60, 80, and 100 μM). Subsequently, the samples were heated to expedite the volatilization of N<sub>2</sub>H<sub>4</sub>. The images were taken using a smartphone under 365 nm UV light to monitor alterations in the fluorescence color.

#### **S5. Soil analysis**

The soil samples were collected from Guilin University of Technology campus, and treated with different concentrations of N<sub>2</sub>H<sub>4</sub> from 0 to 200 μM for 6 h. Then 1g of each concentration of sample was added directly to 3 mL of the probe solution (20 μM) and reacted for about 20 min. Finally, the color values were extracted by capturing images for color identification using a smartphone application under 365

nm UV light.

### **S6. Plant analysis**

The onions were grown in water for 7 days. The control group was treated with water for 8 h. The probe group underwent pre-treatment with the water containing probe **1** (10  $\mu\text{M}$ ) for 4 h. The  $\text{N}_2\text{H}_4$  group was pretreated with  $\text{N}_2\text{H}_4$  (50  $\mu\text{M}$ ) solution for 4 h and then transferred to water containing probe **1** (10  $\mu\text{M}$ ) for an additional 4 h. Then the onion root tips were washed three times with PBS buffer (pH 7.4).

### **S7. Food analysis**

The food samples, comprising rice and mung beans, were procured from local supermarkets. The mung beans were germinated in a controlled humid environment for 48 h. Germinated mung bean sprouts and rice grains were subsequently soaked in the probe solution (20  $\mu\text{M}$ ) for 2 h and then divided into two groups. One group was soaked in distilled water; while the other was treated with  $\text{N}_2\text{H}_4$  solution (200  $\mu\text{M}$ ) for 1h. Photographs of the samples were taken using a smartphone and analyzed with a color recognition application.

### **S8. Preparation of hydrogel-coated test paper and glove**

The polyethylene glycol (2 g) and polyvinyl alcohol (2 g) were dissolved in 20 mL of a mixture of ethanol and water (v/v, 1:1), followed by stirring for 3 h. Subsequently, 5 mg of the probe was added to 5 mL of the aforementioned solution and stirred thoroughly to obtain an aqueous gel solution. Some circular filter papers with a diameter of 1 cm were immersed in the prepared aqueous gel solution and air-dried at room temperature to produce fluorescent hydrogel-coated test papers. Additionally, hydrogel-coated gloves were obtained by immersing laboratory latex gloves in the prepared hydrogel solution containing probe **1**.

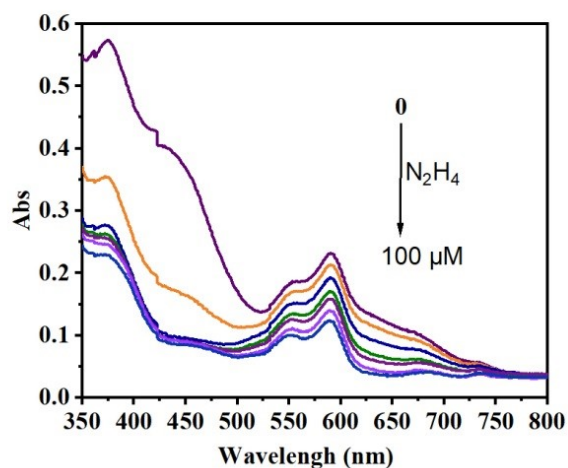

Fig. S1. Absorbance spectra of probe 1 (10  $\mu\text{M}$ ) with different concentrations of  $\text{N}_2\text{H}_4$  (0–100  $\mu\text{M}$ ).

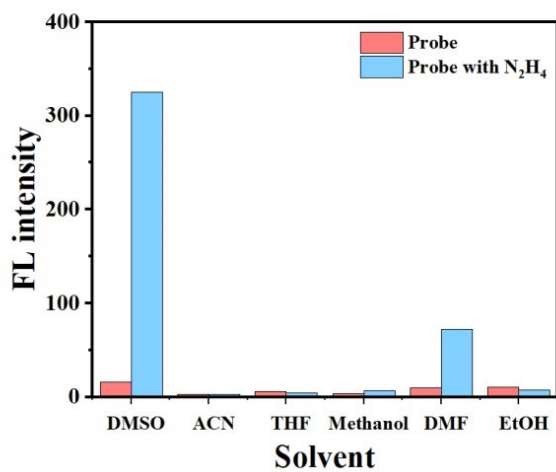

Fig. S2. Effect of different solvent on the fluorescence of probe 1.

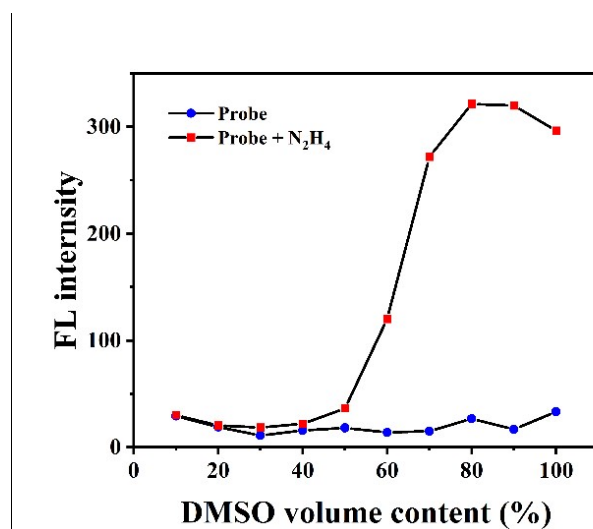

Fig. S3. Effect of solvent system ( $\text{H}_2\text{O}/\text{DMSO}$ ) on the fluorescence of probe 1.

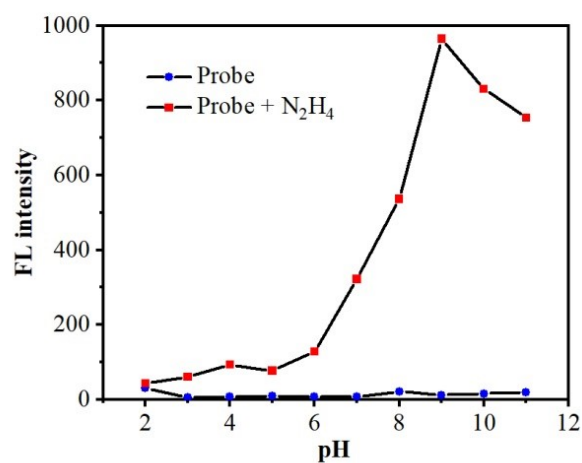

Fig. S4. The fluorescence intensity ( $I_{486}$ ) of probe 1 (10  $\mu$ M) changed with pH before and after adding  $N_2H_4$ .

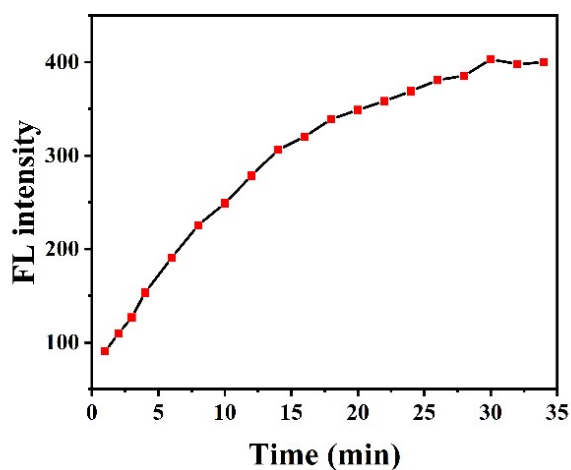

Fig. S5. Fluorescence intensity ( $I_{486}$ ) of probe 1 (10  $\mu$ M) changed with time before and after adding  $N_2H_4$ .

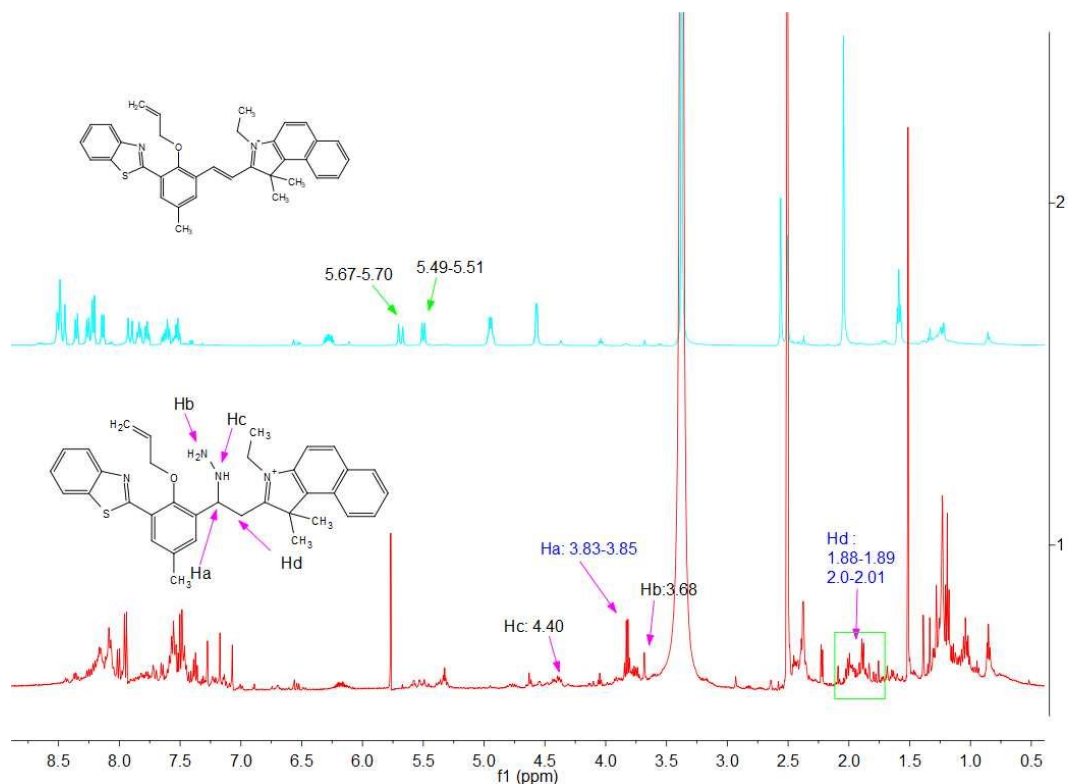

Fig. S6. <sup>1</sup>H NMR Spectra of probe 1 before and after reaction with N<sub>2</sub>H<sub>4</sub>.

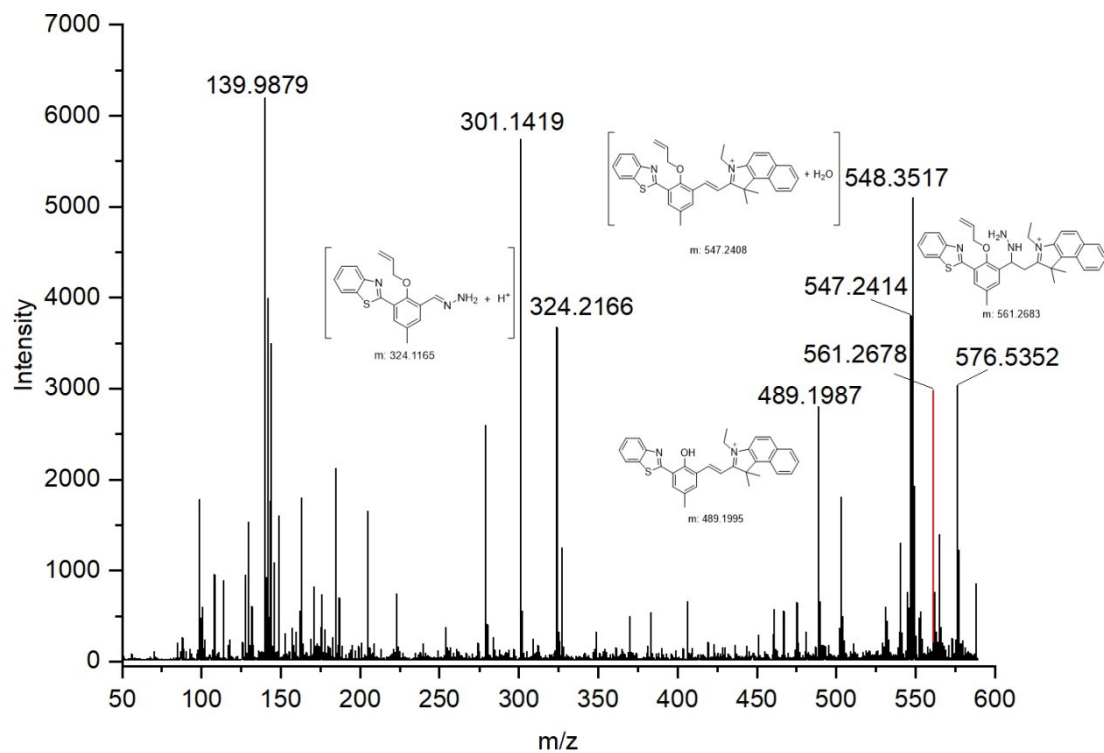

Fig. S7. HRMS of probe 1 treated with N<sub>2</sub>H<sub>4</sub> in CH<sub>3</sub>OH.



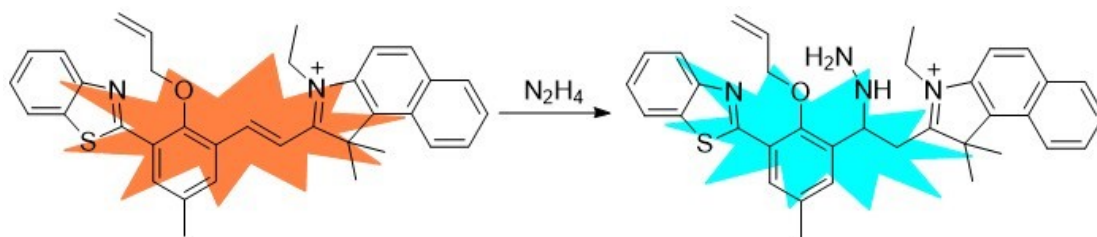

Fig. S8. A possible binding model of probe 1 to  $N_2H_4$ .

Table S4. Recovery of  $N_2H_4$  in water samples achieved using probe 1.

| Samples        | Addition ( $\mu M$ ) | Detection ( $\mu M$ ) | Recovery (%) | RSD (%) |
|----------------|----------------------|-----------------------|--------------|---------|
| River water    | 2                    | 2.01 $\pm$ 0.08       | 100.50       | 4.00    |
|                | 3                    | 3.07 $\pm$ 0.03       | 102.33       | 1.00    |
|                | 10                   | 9.87 $\pm$ 0.24       | 98.70        | 2.40    |
| Drinking water | 2                    | 1.96 $\pm$ 0.1        | 98.00        | 5.00    |
|                | 3                    | 3.04 $\pm$ 0.13       | 101.33       | 4.33    |
|                | 10                   | 10.46 $\pm$ 0.63      | 104.60       | 6.30    |

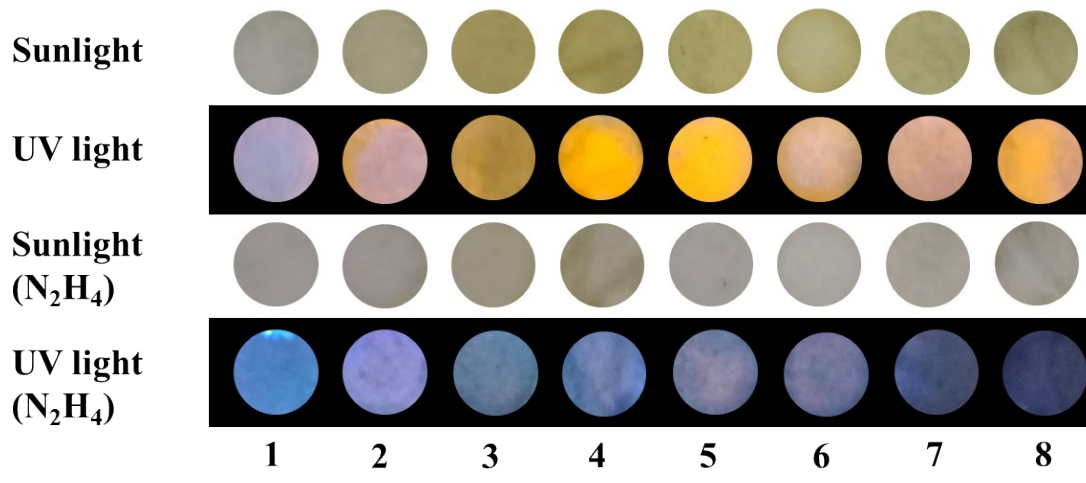

Fig. S9. Pictures of the test papers prepared with probe 1 after dropwise adding various beverages (200  $\mu M$ ). Analytes 1-8: Milk, coconut milk, Coca-Cola, Orange juice, Sprite, white wine, Chinese liquor and pond water.

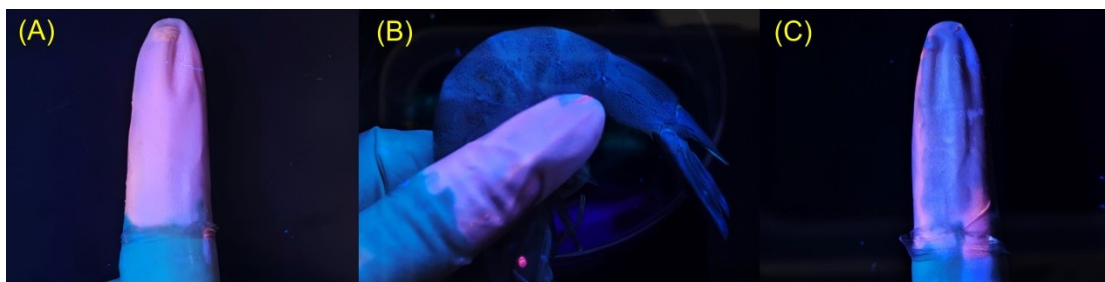

Fig. S10. The fluorescence color of the test glove loaded with hydrogel containing the probe changed before and after exposure to  $N_2H_4$  contamination under 365 nm ultraviolet light.

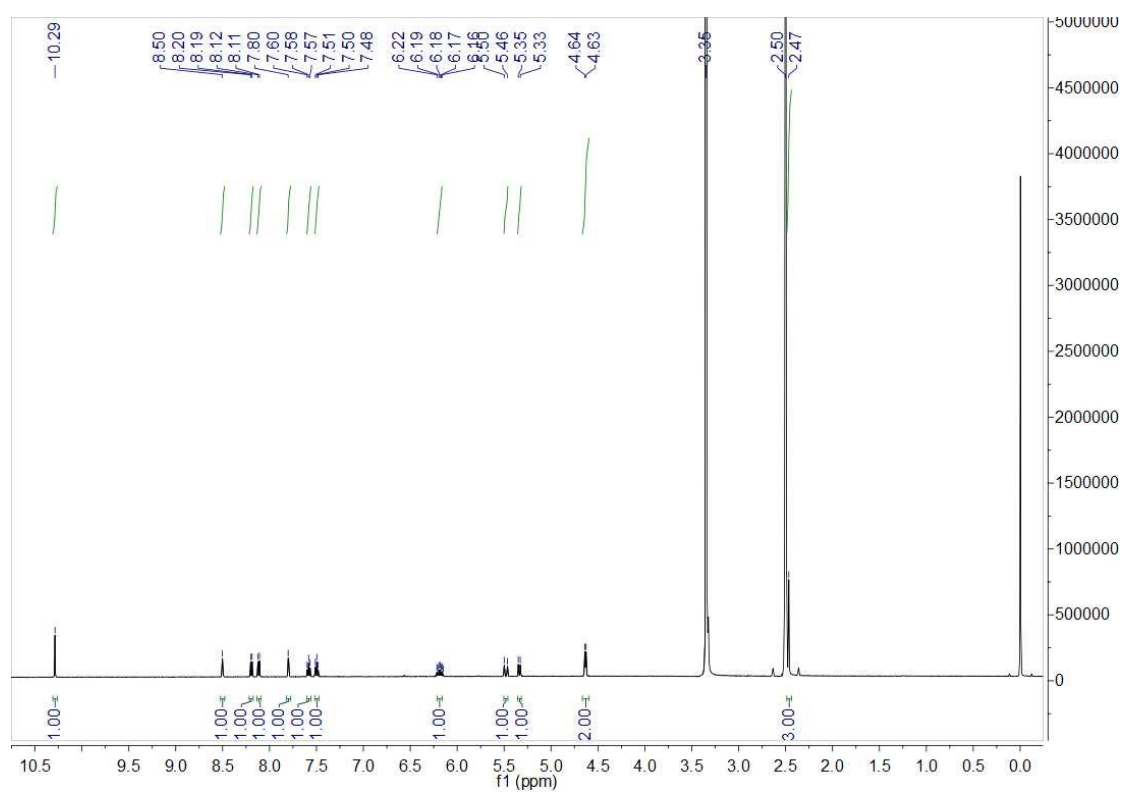

Figure S11.  $^1H$  NMR of intermediate 3 in  $DMSO-d_6$ .



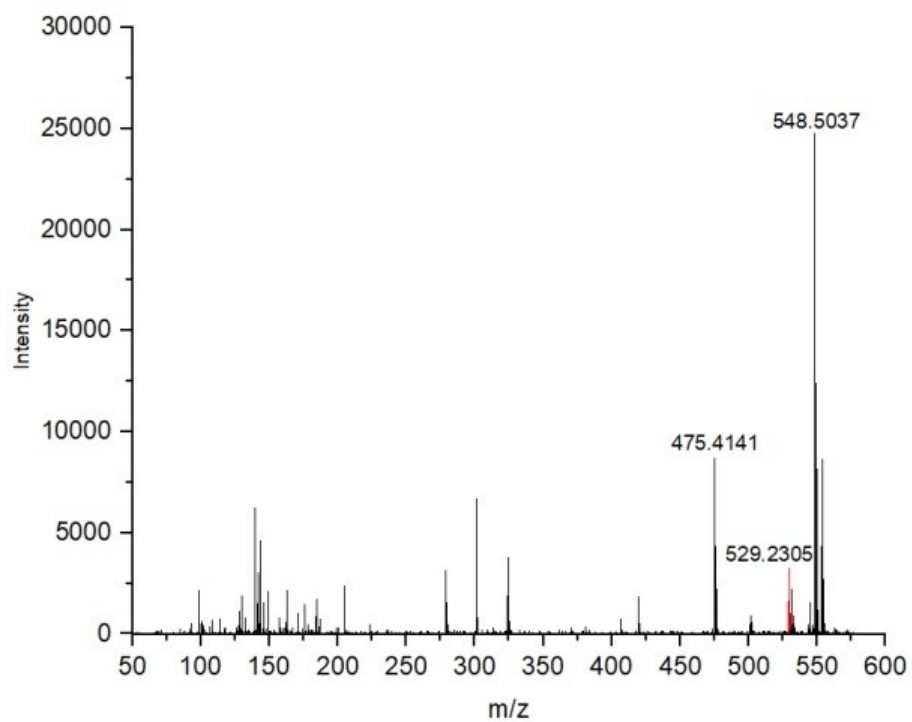

Figure S14. HRMS of probe 1 in CH<sub>3</sub>OH.
